# Supplementary material for: In Vitro and In Silico Analysis of Epithelial-Mesenchymal Transition and Cancer Stemness as Prognostic Markers of Clear Cell Renal Cell Carcinoma
Source: MDPI journal article supplement (doi:10.3390/cancers15092586), 2023-05-01
Supplement: s1 [file s1]

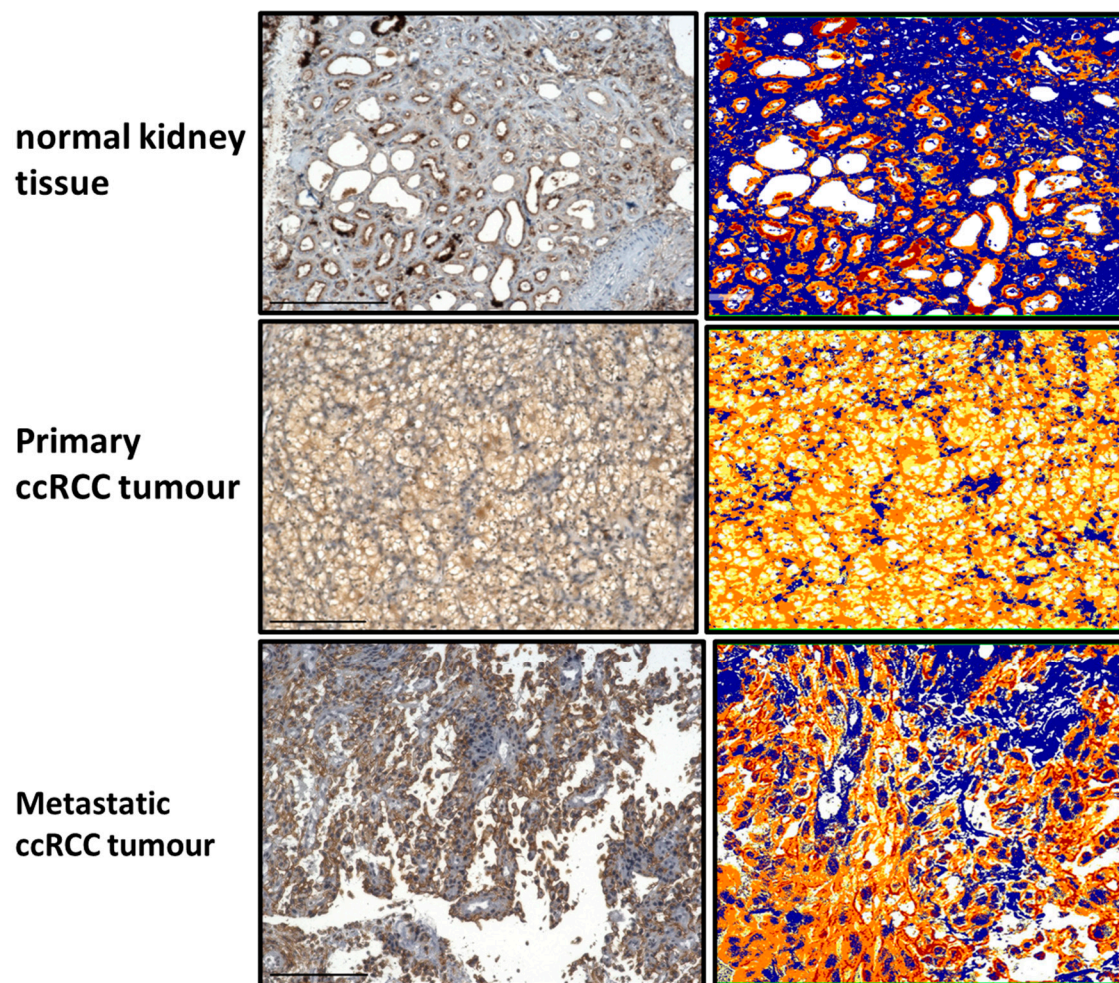

**Figure S1.** Visualization of positive pixel count of CD44 staining for the scanned brown color image analysis by Aperio ImageScope in normal kidney tissue, primary ccRCC tumour and metastatic ccRCC tumour.
